# Supplementary material for: Improving genetic risk modeling of dementia from real-world data in underrepresented populations
Source: PubMed Central journal article supplement — medRxiv. 2024 Feb 6:2024.02.05.24302355. Preprint. [Version 1] doi: 10.1101/2024.02.05.24302355 (PMC10871463; doi:10.1101/2024.02.05.24302355), 2024-02-06
Supplement: media-1.pdf [file media-1.pdf]

**Supplementary Table 1.** GWAS information and summary results of FUMA by phenotype

| GWAS information               |                      |                              |                | # SNPs (overlapped with UCLA and AOU data <sup>b</sup> ) |                           |                            |
|--------------------------------|----------------------|------------------------------|----------------|----------------------------------------------------------|---------------------------|----------------------------|
| Phenotype                      | Summary statistics   | 1000G reference <sup>a</sup> | N case/control | Candidate                                                | Independent P-significant | Independent gene-annotated |
| Alzheimer's Disease            | Kunkle et al. (2019) | EUR                          | 21,982/41,944  | 1744                                                     | 76                        | 75                         |
|                                | Kunkle et al. (2021) | AFR                          | 2,784/5,222    | 80                                                       | 11                        | 11                         |
|                                | Jun et al. (2017)    | ALL                          | 15,579/17,690  | 760                                                      | 54                        | 54                         |
| Parkinson's Disease            | Nalls et al. (2019)  | EUR                          | Meta-analysis  | 2640                                                     | 27                        | 27                         |
| Progressive Supranuclear Palsy | Chen et al. (2018)   | EUR                          | 1,646/10,662   | 732                                                      | 21                        | 21                         |
| Lewy Body Dementia             | Chia et al. (2021)   | EUR                          | 2,981/4,391    | 356                                                      | 9                         | 9                          |
| Stroke                         | Malik et al. (2018)  | ALL                          | 67,162/454,450 | 903                                                      | 21                        | 20                         |

Abbreviations: AFR, African American; EUR, European; GWAS, genome-wide association study; SNP, Single-Nucleotide Polymorphism.

Notes: [a] Reference panel population used for regional linkage disequilibrium patterns in identifying independent SNPs and lead P-significant SNPs. [b] Numbers of features used in PRSs building, feature selection for modeling, and phenotype prediction in the following steps.

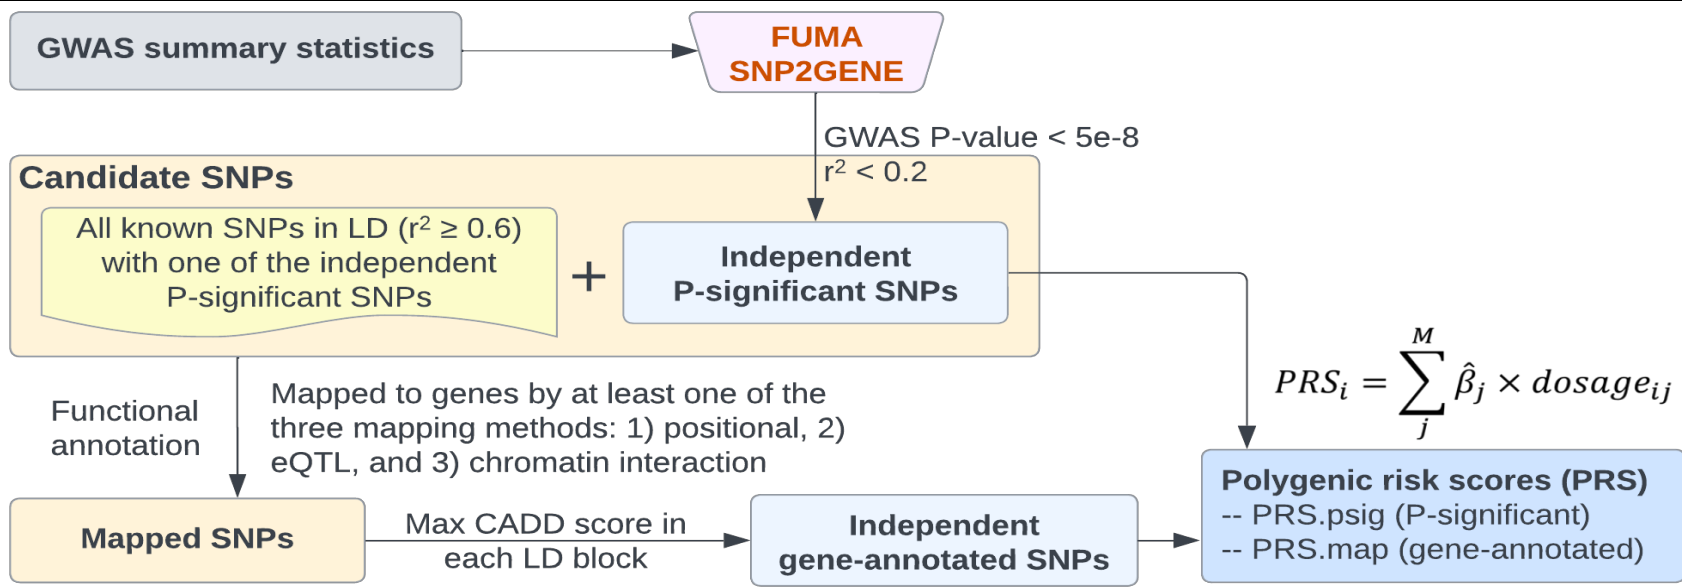

**Supplementary Figure 1. Workflow of candidate SNP selection.** Functional annotation and prioritization of SNPs using FUMA. Two distinct sets of SNPs (independent genome-wide-significant SNPs and independent gene-annotated SNPs) were identified by FUMA and subsequently used in our polygenic risk scores building and modeling steps. *Abbreviations: CADD, Combined Annotation Dependent Depletion; GWAS, genome-wide association study; LD, linkage disequilibrium; PRS, polygenic risk score; SNP, Single-Nucleotide Polymorphism.*

**Supplementary Table 2.** ICD-10 codes used for dementia phenotype definition

| <b>ICD-10 code</b> | <b>Description</b>                                                                                     |
|--------------------|--------------------------------------------------------------------------------------------------------|
| <b>F01</b>         | <b>Vascular dementia</b>                                                                               |
| F01.5              | Multi-infarct dementia                                                                                 |
| F01.50             | Multi-infarct dementia, unspecified                                                                    |
| F01.51             | Multi-infarct dementia with delirium                                                                   |
| F01.511            | Multi-infarct dementia with delirium in Alzheimer's disease                                            |
| F01.518            | Multi-infarct dementia with delirium, not elsewhere classified                                         |
| <b>F02.8*</b>      | <b>Dementia in other diseases classified elsewhere</b>                                                 |
| F02.80             | Dementia in other diseases classified elsewhere, without behavioral disturbance                        |
| F02.81             | Dementia in other diseases classified elsewhere, with behavioral disturbance                           |
| F02.811            | Dementia in other diseases classified elsewhere, with behavioral disturbance in Alzheimer's disease    |
| F02.818            | Dementia in other diseases classified elsewhere, with behavioral disturbance, not elsewhere classified |
| <b>F03</b>         | <b>Unspecified dementia</b>                                                                            |
| F03.9              | Unspecified dementia without behavioral disturbance                                                    |
| F03.90             | Unspecified dementia with delirium                                                                     |
| F03.91             | Unspecified dementia with delirium in Alzheimer's disease                                              |
| F03.911            | Unspecified dementia with delirium in Alzheimer's disease, with behavioral disturbance                 |
| F03.918            | Unspecified dementia with delirium in Alzheimer's disease, not elsewhere classified                    |
| <b>G30</b>         | <b>Alzheimer's disease</b>                                                                             |
| G30.0              | Alzheimer's disease with early onset                                                                   |
| G30.1              | Alzheimer's disease with late onset                                                                    |
| G30.8              | Other Alzheimer's disease                                                                              |
| G30.9              | Alzheimer's disease, unspecified                                                                       |
| <b>G31</b>         | <b>Other degenerative diseases of nervous system, not elsewhere classified</b>                         |
| G31.0              | Pick's disease                                                                                         |
| G31.01             | Pick's disease with early onset                                                                        |
| G31.09             | Pick's disease with late onset                                                                         |
| G31.1              | Frontotemporal dementia                                                                                |
| G31.83             | Dementia with Lewy bodies                                                                              |
| G31.85             | Corticobasal degeneration                                                                              |
| G23.1              | Parkinson's disease with dementia                                                                      |

**Supplementary Table 3.** Model performance of *APOE-ε4* count, polygenic risk score, and Elastic Net SNP models in dementia genetic prediction, UCLA ATLAS sample, stratified by genetic inferred ancestry<sup>a</sup>

|                                            |                | AUPRC                       | AUROC                       | F1 score                    | Accuracy                    | Precision                   | Recall                      | Specificity                 |
|--------------------------------------------|----------------|-----------------------------|-----------------------------|-----------------------------|-----------------------------|-----------------------------|-----------------------------|-----------------------------|
| <b>Hispanic Latino Americans (N = 610)</b> |                |                             |                             |                             |                             |                             |                             |                             |
| APOE                                       | ε4 count       | 0.373 (0.347, 0.402)        | 0.652 (0.634, 0.67)         | 0.454 (0.421, 0.478)        | 0.673 (0.595, 0.714)        | 0.394 (0.346, 0.432)        | 0.547 (0.428, 0.706)        | 0.714 (0.558, 0.802)        |
| <b>AD-PRS models</b>                       |                |                             |                             |                             |                             |                             |                             |                             |
| AD EUR PRS                                 | P-significant  | 0.359 (0.334, 0.389)        | 0.618 (0.598, 0.641)        | 0.352 (0.181, 0.457)        | 0.659 (0.421, 0.764)        | 0.436 (0.292, 0.684)        | 0.429 (0.103, 0.929)        | 0.735 (0.254, 0.984)        |
|                                            | Gene-annotated | 0.349 (0.325, 0.382)        | 0.609 (0.585, 0.633)        | 0.322 (0.118, 0.45)         | 0.682 (0.437, 0.764)        | 0.457 (0.293, 0.818)        | 0.355 (0.063, 0.889)        | <b>0.791 (0.288, 0.995)</b> |
| AD AFR PRS                                 | P-significant  | 0.374 (0.35, 0.403)         | 0.645 (0.63, 0.663)         | 0.438 (0.232, 0.473)        | 0.658 (0.538, 0.766)        | 0.39 (0.324, 0.652)         | 0.548 (0.143, 0.77)         | 0.694 (0.468, 0.974)        |
|                                            | Gene-annotated | 0.371 (0.345, 0.4)          | 0.648 (0.631, 0.666)        | 0.459 (0.433, 0.481)        | 0.667 (0.597, 0.71)         | 0.39 (0.347, 0.428)         | 0.565 (0.46, 0.706)         | 0.701 (0.561, 0.788)        |
| AD multi-ancestry PRS                      | P-significant  | 0.361 (0.336, 0.392)        | 0.628 (0.609, 0.648)        | 0.373 (0.132, 0.461)        | 0.616 (0.425, 0.766)        | 0.419 (0.293, 0.818)        | 0.535 (0.071, 0.929)        | 0.643 (0.264, 0.995)        |
|                                            | Gene-annotated | 0.363 (0.338, 0.394)        | 0.641 (0.624, 0.66)         | 0.444 (0.207, 0.473)        | 0.521 (0.423, 0.764)        | 0.338 (0.294, 0.667)        | <b>0.792 (0.119, 0.944)</b> | 0.431 (0.246, 0.979)        |
| <b>Multi-PRS models</b>                    |                |                             |                             |                             |                             |                             |                             |                             |
| PRSs using AD GWASs only <sup>b</sup>      | P-significant  | 0.367 (0.34, 0.398)         | 0.634 (0.612, 0.656)        | 0.427 (0.212, 0.471)        | 0.659 (0.559, 0.762)        | 0.389 (0.327, 0.633)        | 0.525 (0.127, 0.722)        | 0.703 (0.51, 0.974)         |
|                                            | Gene-annotated | 0.364 (0.335, 0.395)        | 0.637 (0.613, 0.658)        | 0.42 (0.168, 0.467)         | 0.648 (0.446, 0.766)        | 0.396 (0.301, 0.769)        | 0.537 (0.095, 0.913)        | 0.685 (0.291, 0.992)        |
| PRSs using AD + Neuro GWASs <sup>c</sup>   | P-significant  | 0.344 (0.31, 0.38)          | 0.608 (0.575, 0.637)        | 0.39 (0.144, 0.456)         | 0.659 (0.532, 0.76)         | 0.387 (0.31, 0.636)         | 0.463 (0.079, 0.762)        | 0.724 (0.46, 0.984)         |
|                                            | Gene-annotated | 0.357 (0.324, 0.393)        | 0.607 (0.578, 0.634)        | 0.379 (0.119, 0.462)        | 0.67 (0.557, 0.766)         | 0.431 (0.32, 0.889)         | 0.447 (0.063, 0.699)        | 0.744 (0.518, 0.997)        |
| <b>Elastic Net SNPs models</b>             |                |                             |                             |                             |                             |                             |                             |                             |
| SNPs from AD GWASs only                    | P-significant  | 0.398 (0.364, 0.441)        | 0.68 (0.649, 0.709)         | 0.476 (0.406, 0.513)        | 0.617 (0.49, 0.734)         | 0.374 (0.316, 0.46)         | 0.706 (0.373, 0.921)        | 0.587 (0.354, 0.854)        |
|                                            | Gene-annotated | 0.41 (0.378, 0.449)         | 0.681 (0.651, 0.702)        | 0.45 (0.296, 0.5)           | 0.675 (0.53, 0.772)         | 0.426 (0.329, 0.645)        | 0.555 (0.19, 0.849)         | 0.715 (0.423, 0.963)        |
| SNPs from AD + Neuro GWASs                 | P-significant  | 0.415 (0.376, 0.46)         | 0.699 (0.664, 0.727)        | 0.492 (0.437, 0.527)        | 0.635 (0.508, 0.74)         | 0.388 (0.323, 0.477)        | 0.712 (0.412, 0.913)        | 0.609 (0.378, 0.841)        |
|                                            | Gene-annotated | <b>0.451 (0.402, 0.495)</b> | <b>0.715 (0.662, 0.739)</b> | <b>0.498 (0.383, 0.541)</b> | <b>0.701 (0.597, 0.776)</b> | <b>0.447 (0.363, 0.604)</b> | 0.604 (0.286, 0.833)        | 0.733 (0.521, 0.934)        |
| <b>African Americans (N = 440)</b>         |                |                             |                             |                             |                             |                             |                             |                             |
| APOE                                       | ε4 count       | 0.307 (0.282, 0.343)        | 0.596 (0.569, 0.623)        | 0.441 (0.398, 0.474)        | 0.589 (0.476, 0.679)        | 0.346 (0.301, 0.374)        | 0.66 (0.428, 0.857)         | 0.566 (0.353, 0.762)        |
| <b>AD-PRS models</b>                       |                |                             |                             |                             |                             |                             |                             |                             |
| AD EUR PRS                                 | P-significant  | 0.272 (0.249, 0.302)        | 0.561 (0.525, 0.595)        | 0.411 (0.367, 0.441)        | 0.552 (0.327, 0.643)        | 0.316 (0.266, 0.347)        | 0.636 (0.428, 0.976)        | 0.524 (0.111, 0.722)        |
|                                            | Gene-annotated | 0.273 (0.243, 0.314)        | 0.548 (0.505, 0.584)        | 0.393 (0.069, 0.44)         | 0.494 (0.354, 0.753)        | 0.311 (0.214, 0.6)          | 0.7 (0.048, 0.917)          | 0.426 (0.162, 0.988)        |
| AD AFR PRS                                 | P-significant  | 0.277 (0.25, 0.31)          | 0.566 (0.527, 0.599)        | 0.402 (0.019, 0.444)        | 0.492 (0.241, 0.696)        | 0.293 (0.053, 0.373)        | 0.715 (0.012, 0.964)        | 0.418 (0, 0.917)            |
|                                            | Gene-annotated | 0.274 (0.25, 0.306)         | 0.562 (0.527, 0.595)        | 0.413 (0.381, 0.444)        | 0.47 (0.238, 0.631)         | 0.295 (0.239, 0.341)        | 0.74 (0.488, 0.964)         | 0.38 (0, 0.671)             |
| AD multi-ancestry PRS                      | P-significant  | 0.281 (0.255, 0.314)        | 0.574 (0.542, 0.604)        | 0.434 (0.391, 0.453)        | 0.482 (0.399, 0.661)        | 0.304 (0.282, 0.356)        | 0.799 (0.44, 0.929)         | 0.376 (0.222, 0.738)        |
|                                            | Gene-annotated | 0.282 (0.258, 0.313)        | 0.581 (0.549, 0.61)         | 0.44 (0.421, 0.458)         | 0.477 (0.363, 0.595)        | 0.302 (0.277, 0.327)        | <b>0.823 (0.607, 0.964)</b> | 0.362 (0.171, 0.591)        |
| <b>Multi-PRS models</b>                    |                |                             |                             |                             |                             |                             |                             |                             |
| PRSs using AD GWASs only <sup>b</sup>      | P-significant  | 0.263 (0.235, 0.292)        | 0.549 (0.502, 0.591)        | 0.381 (0.02, 0.449)         | 0.525 (0.39, 0.697)         | 0.282 (0.062, 0.342)        | 0.648 (0.012, 0.893)        | 0.484 (0.226, 0.925)        |
|                                            | Gene-annotated | 0.267 (0.24, 0.298)         | 0.551 (0.509, 0.589)        | 0.418 (0.108, 0.453)        | 0.482 (0.363, 0.634)        | 0.299 (0.248, 0.324)        | 0.767 (0.095, 0.941)        | 0.387 (0.175, 0.81)         |
| PRSs using AD + Neuro GWASs <sup>c</sup>   | P-significant  | 0.234 (0.209, 0.262)        | 0.486 (0.428, 0.54)         | 0.177 (0.018, 0.416)        | 0.558 (0.244, 0.711)        | 0.17 (0.04, 0.325)          | 0.305 (0.012, 1)            | 0.642 (0.012, 0.944)        |
|                                            | Gene-annotated | 0.252 (0.225, 0.287)        | 0.508 (0.463, 0.554)        | 0.291 (0.02, 0.42)          | 0.454 (0.244, 0.756)        | 0.288 (0.071, 1)            | 0.596 (0.012, 0.988)        | 0.407 (0, 1)                |
| <b>Elastic Net SNPs models</b>             |                |                             |                             |                             |                             |                             |                             |                             |
| SNPs from AD GWASs only                    | P-significant  | 0.395 (0.348, 0.445)        | 0.655 (0.625, 0.685)        | 0.424 (0.191, 0.493)        | 0.677 (0.491, 0.774)        | 0.442 (0.314, 0.819)        | 0.509 (0.107, 0.881)        | 0.733 (0.365, 0.992)        |
|                                            | Gene-annotated | 0.42 (0.369, 0.473)         | 0.663 (0.632, 0.694)        | 0.382 (0.154, 0.495)        | 0.718 (0.5, 0.783)          | <b>0.548 (0.319, 1)</b>     | 0.395 (0.083, 0.893)        | <b>0.826 (0.373, 1)</b>     |
| SNPs from AD + Neuro GWASs                 | P-significant  | 0.445 (0.389, 0.507)        | 0.689 (0.655, 0.724)        | 0.416 (0.252, 0.52)         | <b>0.721 (0.503, 0.789)</b> | 0.54 (0.324, 0.867)         | 0.436 (0.154, 0.917)        | 0.816 (0.365, 0.992)        |
|                                            | Gene-annotated | <b>0.451 (0.397, 0.506)</b> | <b>0.698 (0.665, 0.73)</b>  | <b>0.459 (0.28, 0.532)</b>  | 0.72 (0.562, 0.789)         | 0.5 (0.346, 0.827)          | 0.499 (0.167, 0.845)        | 0.794 (0.464, 0.988)        |

Abbreviations: AD, Alzheimer's Disease; APOE, apolipoprotein E; AUROC, Area Under the ROC Curve; AUPRC, Area Under the Precision-Recall Curve; EUR, European; GWAS, Genome-Wide Association Study; PRS, Polygenic Risk Score; SNP, Single-Nucleotide Polymorphism.

**Notes:**

[a] All models (if not other specified) have regressed out age, sex, and ancestry-specific principal components. Thresholds were determined by maximizing absolute Matthews correlation coefficient.

[b] All AD PRSs built with EUR, AFR, and multi-ancestry GWASs using P-significant/gene-annotated SNPs were included in the model at the same time.

[c] All AD PRSs built with EUR, AFR, and multi-ancestry GWASs, and neurodegenerative disease PRS (Parkinson's disease, progressive supranuclear palsy, Lewy body dementia, and stroke) using P-significant/gene-annotated SNPs were included in the model at the same time.

**Supplementary Table 4.** Performance of models using lead SNPs ( $r^2$  cut-off <0.1 for defining independent genome-wide-significant SNPs) in dementia genetic prediction, UCLA ATLAS sample, stratified by genetic inferred ancestry<sup>a</sup>

| Hispanic Latino American ancestry sample (N = 610) |                             |                             |                                 |                            |                             |                             |                             |
|----------------------------------------------------|-----------------------------|-----------------------------|---------------------------------|----------------------------|-----------------------------|-----------------------------|-----------------------------|
|                                                    | Overall performance         |                             | Threshold maximize absolute MCC |                            |                             |                             |                             |
|                                                    | AUPRC                       | AUROC                       | F1 score                        | Accuracy                   | Precision                   | Recall                      | Specificity                 |
| AD EUR PRS                                         | 0.343 (0.316, 0.372)        | 0.598 (0.57, 0.624)         | 0.289 (0.103, 0.444)            | 0.702 (0.456, 0.766)       | <b>0.497 (0.295, 0.875)</b> | 0.29 (0.056, 0.841)         | 0.84 (0.323, 0.997)         |
| AD AFR PRS                                         | 0.377 (0.35, 0.407)         | 0.649 (0.631, 0.666)        | 0.453 (0.414, 0.48)             | 0.675 (0.567, 0.718)       | 0.397 (0.337, 0.439)        | 0.542 (0.413, 0.754)        | 0.719 (0.51, 0.812)         |
| AD multi-ancestry PRS                              | 0.369 (0.346, 0.398)        | 0.624 (0.607, 0.643)        | 0.342 (0.144, 0.446)            | <b>0.71 (0.551, 0.768)</b> | 0.484 (0.325, 0.819)        | 0.337 (0.079, 0.738)        | <b>0.835 (0.494, 0.995)</b> |
| PRSs using AD GWASs only <sup>b</sup>              | 0.363 (0.331, 0.396)        | 0.623 (0.596, 0.65)         | 0.436 (0.391, 0.467)            | 0.682 (0.617, 0.724)       | 0.399 (0.351, 0.443)        | 0.497 (0.373, 0.643)        | 0.743 (0.611, 0.844)        |
| PRSs using AD + Neuro GWASs <sup>c</sup>           | 0.346 (0.31, 0.384)         | 0.603 (0.569, 0.635)        | 0.385 (0.2, 0.446)              | 0.693 (0.589, 0.762)       | 0.409 (0.332, 0.632)        | 0.399 (0.119, 0.651)        | 0.791 (0.577, 0.976)        |
| SNPs from AD GWASs only                            | 0.406 (0.371, 0.438)        | 0.683 (0.648, 0.705)        | 0.472 (0.387, 0.504)            | 0.622 (0.486, 0.74)        | 0.382 (0.316, 0.475)        | <b>0.687 (0.341, 0.929)</b> | 0.6 (0.341, 0.868)          |
| SNPs from AD + Neuro GWASs                         | <b>0.411 (0.373, 0.446)</b> | <b>0.689 (0.651, 0.712)</b> | <b>0.475 (0.398, 0.509)</b>     | 0.628 (0.494, 0.75)        | 0.386 (0.321, 0.5)          | 0.683 (0.341, 0.929)        | 0.61 (0.352, 0.881)         |
| African American ancestry sample (N = 440)         |                             |                             |                                 |                            |                             |                             |                             |
|                                                    | Overall performance         |                             | Threshold maximize absolute MCC |                            |                             |                             |                             |
|                                                    | AUPRC                       | AUROC                       | F1 score                        | Accuracy                   | Precision                   | Recall                      | Specificity                 |
| AD EUR PRS                                         | 0.251 (0.214, 0.303)        | 0.491 (0.428, 0.549)        | 0.268 (0.02, 0.415)             | 0.475 (0.241, 0.759)       | 0.347 (0.067, 1)            | 0.519 (0.012, 0.976)        | 0.461 (0, 1)                |
| AD AFR PRS                                         | 0.3 (0.271, 0.34)           | 0.578 (0.552, 0.606)        | 0.393 (0.286, 0.433)            | 0.611 (0.333, 0.741)       | 0.347 (0.269, 0.455)        | 0.521 (0.214, 0.976)        | 0.641 (0.119, 0.917)        |
| AD multi-ancestry PRS                              | 0.305 (0.277, 0.34)         | 0.595 (0.57, 0.62)          | 0.438 (0.421, 0.459)            | 0.508 (0.408, 0.595)       | 0.315 (0.285, 0.337)        | <b>0.776 (0.619, 0.929)</b> | 0.418 (0.234, 0.583)        |
| PRSs using AD GWASs only <sup>b</sup>              | 0.315 (0.283, 0.355)        | 0.582 (0.551, 0.613)        | 0.367 (0.145, 0.45)             | 0.576 (0.396, 0.759)       | 0.373 (0.279, 0.751)        | 0.568 (0.083, 0.917)        | 0.578 (0.226, 0.992)        |
| PRSs using AD + Neuro GWASs <sup>c</sup>           | 0.3 (0.267, 0.34)           | 0.575 (0.539, 0.61)         | 0.404 (0.11, 0.448)             | 0.508 (0.351, 0.759)       | 0.333 (0.27, 0.801)         | 0.713 (0.06, 0.964)         | 0.439 (0.151, 0.996)        |
| SNPs from AD GWASs only                            | 0.337 (0.295, 0.382)        | 0.627 (0.589, 0.662)        | 0.451 (0.376, 0.49)             | 0.61 (0.488, 0.729)        | 0.359 (0.306, 0.456)        | 0.649 (0.333, 0.845)        | 0.597 (0.373, 0.857)        |
| SNPs from AD + Neuro GWASs                         | <b>0.379 (0.332, 0.429)</b> | <b>0.666 (0.634, 0.696)</b> | <b>0.476 (0.405, 0.52)</b>      | <b>0.67 (0.554, 0.762)</b> | <b>0.41 (0.335, 0.533)</b>  | 0.606 (0.345, 0.833)        | <b>0.691 (0.464, 0.901)</b> |

Abbreviations: AD, Alzheimer's Disease; AFR, African American; AUROC, Area Under the ROC Curve; AUPRC, Area Under the Precision-Recall Curve; EUR, European; GWAS, Genome-Wide Association Study; MCC, Matthews Correlation Coefficient; PRS, Polygenic Risk Score; SNP, Single-Nucleotide Polymorphism.

**Notes:**

[a] All models (if not other specified) adjusted for age, sex, and first four ancestry-specific principal components.

[b] All AD PRSs built with EUR, AFR, and multi-ancestry GWASs using P-significant/gene-annotated SNPs were included in the model at the same time.

[c] All AD PRSs built with EUR, AFR, and multi-ancestry GWASs, and neurodegenerative disease PRS (Parkinson's disease, progressive supranuclear palsy, Lewy body dementia, and stroke) using P-significant/gene-annotated SNPs were included in the model at the same time.

**Supplementary Table 5.** Mapped genes of selected risk SNPs from the best-performing Elastic Net SNP model, UCLA ATLAS sample, by genetic inferred ancestry

| Hispanic Latino Americans (HLA) |                 |                      |     |           |           |                |        |                     |       |
|---------------------------------|-----------------|----------------------|-----|-----------|-----------|----------------|--------|---------------------|-------|
| No                              | Gene            | Symbol               | CHR | Start     | End       | Type           | posMap | eqtIMap (Direction) | ciMap |
| 1                               | ENSG00000144659 | <i>SLC25A38</i>      | 3   | 39424839  | 39438842  | protein_coding | No     | Yes (+)             | No    |
| 2                               | ENSG00000168028 | <i>RPSA</i>          | 3   | 39448180  | 39454033  | protein_coding | Yes    | Yes (+)             | No    |
| 3                               | ENSG00000185619 | <i>PCGF3</i>         | 4   | 699537    | 764428    | protein_coding | Yes    | Yes (-)             | No    |
| 4                               | ENSG00000249519 | <i>RP11-777N19.1</i> | 4   | 111715559 | 111718500 | lincRNA        | Yes    | No                  | No    |
| 5                               | ENSG00000137642 | <i>SORL1</i>         | 11  | 121322912 | 121504402 | protein_coding | Yes    | No                  | No    |
| 6                               | ENSG00000266903 | <i>CTB-171A8.1</i>   | 19  | 45135500  | 45222031  | antisense      | Yes    | No                  | No    |
| 7                               | ENSG00000252200 | <i>snoZ6</i>         | 19  | 45229248  | 45229322  | snoRNA         | Yes    | No                  | No    |
| 8                               | ENSG00000187244 | <i>BCAM</i>          | 19  | 45312328  | 45324673  | protein_coding | Yes    | No                  | No    |
| 9                               | ENSG00000130202 | <i>PVRL2</i>         | 19  | 45349432  | 45392485  | protein_coding | Yes    | No                  | No    |
| 10                              | ENSG00000130204 | <i>TOMM40</i>        | 19  | 45393826  | 45406946  | protein_coding | Yes    | No                  | No    |
| 11                              | ENSG00000130203 | <i>APOE</i>          | 19  | 45409011  | 45412650  | protein_coding | Yes    | No                  | No    |
| 12                              | ENSG00000130208 | <i>APOC1</i>         | 19  | 45417504  | 45422606  | protein_coding | Yes    | No                  | No    |
| 13                              | ENSG00000214855 | <i>APOC1P1</i>       | 19  | 45430061  | 45434643  | pseudogene     | No     | No                  | Yes   |
| 14                              | ENSG00000104859 | <i>CLASRP</i>        | 19  | 45542298  | 45574214  | protein_coding | No     | No                  | Yes   |
| African Americans (AA)          |                 |                      |     |           |           |                |        |                     |       |
| No                              | Gene            | Symbol               | CHR | Start     | End       | Type           | posMap | eqtIMap (Direction) | ciMap |
| 1                               | ENSG00000136717 | <i>BINI</i>          | 2   | 127805603 | 127864931 | protein_coding | Yes    | No                  | No    |
| 2                               | ENSG00000159840 | <i>ZYX</i>           | 7   | 143078173 | 143088204 | protein_coding | Yes    | No                  | No    |
| 3                               | ENSG00000050327 | <i>ARHGEF5</i>       | 7   | 144052381 | 144077725 | protein_coding | No     | Yes (+)             | No    |
| 4                               | ENSG00000080854 | <i>IGSF9B</i>        | 11  | 133778459 | 133826880 | protein_coding | Yes    | No                  | No    |
| 5                               | ENSG00000255406 | <i>RP11-713P17.5</i> | 11  | 133896882 | 133898013 | lincRNA        | No     | No                  | Yes   |
| 6                               | ENSG00000166086 | <i>JAM3</i>          | 11  | 133938820 | 134021896 | protein_coding | No     | No                  | Yes   |
| 7                               | ENSG00000254481 | <i>PTP4A2P2</i>      | 11  | 133993723 | 133994224 | pseudogene     | No     | No                  | Yes   |
| 8                               | ENSG00000180329 | <i>CCDC43</i>        | 17  | 42750437  | 42767147  | protein_coding | No     | No                  | Yes   |
| 9                               | ENSG00000161692 | <i>DBF4B</i>         | 17  | 42785976  | 42829632  | protein_coding | No     | Yes (-)             | No    |
| 10                              | ENSG00000073670 | <i>ADAM11</i>        | 17  | 42836399  | 42859214  | protein_coding | No     | No                  | Yes   |
| 11                              | ENSG00000131095 | <i>GFAP</i>          | 17  | 42982376  | 42994305  | protein_coding | No     | No                  | Yes   |
| 12                              | ENSG00000131094 | <i>CIQL1</i>         | 17  | 43037061  | 43045439  | protein_coding | Yes    | Yes (+)             | No    |
| 13                              | ENSG00000267788 | <i>CTD-2534I21.9</i> | 17  | 43059882  | 43060140  | lincRNA        | No     | No                  | Yes   |
| 14                              | ENSG00000267282 | <i>CTB-129P6.4</i>   | 19  | 45385284  | 45394133  | antisense      | Yes    | No                  | No    |
| 15                              | ENSG00000130204 | <i>TOMM40</i>        | 19  | 45393826  | 45406946  | protein_coding | Yes    | No                  | No    |
| 16                              | ENSG00000130203 | <i>APOE</i>          | 19  | 45409011  | 45412650  | protein_coding | Yes    | Yes (-)             | No    |
| 17                              | ENSG00000214855 | <i>APOC1P1</i>       | 19  | 45430061  | 45434643  | pseudogene     | Yes    | Yes (+)             | Yes   |
| 18                              | ENSG00000104859 | <i>CLASRP</i>        | 19  | 45542298  | 45574214  | protein_coding | No     | No                  | Yes   |

**Supplementary Table 6A.** Descriptive statistics of demographic and electronic health record features by case/control groups, UCLA ATLAS sample (East Asian American ancestry group, N = 673)

|                            | <b>Cases</b>      | <b>Controls</b>   | <b>P value</b> |
|----------------------------|-------------------|-------------------|----------------|
| N                          | 75                | 598               | -              |
| Age                        | 80.1 (73.2, 83.5) | 76.3 (72.9, 80.7) | 0.04*          |
| Sex (Female)               | 48 (64%)          | 325 (54%)         | 0.11           |
| Span of records (in yrs)   | 5.3 (2.7, 7.8)    | 9.8 (8.0, 12.0)   | <0.001*        |
| Encounters per year        | 17 (9, 28)        | 12 (7, 18)        | 0.002*         |
| Number of encounters       | 73 (23, 137)      | 121 (68, 185)     | <0.001*        |
| Number of unique diagnosis | 64 (35, 92)       | 60 (38, 90)       | 0.80           |

*Abbreviations: EHR, electronic health record.*

**Notes:** Continuous variables were reported as median (IQR), and categorical variables were reported as n (%). P-values were calculated based on Wilcoxon rank sum test or Pearson's Chi-squared test as appropriate. \* Statistical significant at level 0.05.

**Supplementary Table 6B.** Model performance of *APOE-e4* count, polygenic risk score, and Elastic Net SNP models in dementia genetic prediction, UCLA ATLAS sample (East Asian American ancestry group, N = 673)<sup>a</sup>

|                                                |                | AUPRC                       | AUROC                       | F1 score                    | Accuracy                   | Precision                   | Recall                     | Specificity                 |
|------------------------------------------------|----------------|-----------------------------|-----------------------------|-----------------------------|----------------------------|-----------------------------|----------------------------|-----------------------------|
| <b>APOE</b>                                    | e4 count       | 0.463 (0.409, 0.516)        | 0.708 (0.678, 0.733)        | 0.476 (0.28, 0.539)         | 0.725 (0.593, 0.793)       | 0.502 (0.361, 0.818)        | 0.523 (0.173, 0.827)       | 0.792 (0.52, 0.987)         |
| <b>AD-PRS models</b>                           |                |                             |                             |                             |                            |                             |                            |                             |
| <b>AD EUR PRS</b>                              | P-significant  | 0.442 (0.396, 0.493)        | 0.688 (0.658, 0.715)        | 0.425 (0.23, 0.516)         | 0.712 (0.513, 0.787)       | 0.524 (0.328, 0.9)          | 0.468 (0.133, 0.907)       | 0.793 (0.382, 0.996)        |
|                                                | Gene-annotated | 0.434 (0.392, 0.482)        | 0.684 (0.651, 0.714)        | 0.416 (0.212, 0.513)        | 0.703 (0.493, 0.787)       | 0.523 (0.32, 0.909)         | 0.473 (0.12, 0.92)         | 0.78 (0.355, 0.996)         |
| <b>AD AFR PRS</b>                              | P-significant  | 0.457 (0.408, 0.51)         | 0.703 (0.673, 0.728)        | 0.469 (0.28, 0.532)         | 0.723 (0.573, 0.79)        | 0.503 (0.352, 0.833)        | 0.512 (0.173, 0.84)        | 0.794 (0.484, 0.991)        |
|                                                | Gene-annotated | 0.452 (0.404, 0.501)        | 0.698 (0.669, 0.722)        | 0.462 (0.264, 0.529)        | 0.72 (0.583, 0.787)        | 0.5 (0.355, 0.834)          | 0.507 (0.16, 0.827)        | 0.791 (0.502, 0.991)        |
| <b>AD multi-ancestry PRS</b>                   | P-significant  | 0.459 (0.407, 0.511)        | 0.702 (0.671, 0.727)        | 0.46 (0.27, 0.533)          | 0.729 (0.587, 0.79)        | <b>0.519 (0.358, 0.857)</b> | 0.49 (0.16, 0.813)         | 0.808 (0.507, 0.991)        |
|                                                | Gene-annotated | 0.454 (0.406, 0.506)        | 0.697 (0.666, 0.722)        | 0.457 (0.264, 0.53)         | 0.727 (0.6, 0.79)          | 0.514 (0.36, 0.857)         | 0.487 (0.16, 0.787)        | 0.807 (0.533, 0.991)        |
| <b>Multi-PRS models</b>                        |                |                             |                             |                             |                            |                             |                            |                             |
| <b>PRSs using AD GWASs only<sup>b</sup></b>    | P-significant  | 0.454 (0.401, 0.507)        | 0.697 (0.667, 0.723)        | 0.461 (0.267, 0.529)        | 0.727 (0.6, 0.79)          | 0.511 (0.358, 0.842)        | 0.492 (0.16, 0.787)        | <b>0.805 (0.542, 0.991)</b> |
|                                                | Gene-annotated | 0.45 (0.4, 0.501)           | 0.698 (0.665, 0.726)        | 0.461 (0.253, 0.527)        | 0.721 (0.563, 0.787)       | 0.499 (0.346, 0.833)        | 0.501 (0.147, 0.84)        | 0.795 (0.471, 0.991)        |
| <b>PRSs using AD + Neuro GWASs<sup>c</sup></b> | P-significant  | 0.453 (0.402, 0.51)         | 0.699 (0.666, 0.728)        | 0.459 (0.253, 0.532)        | 0.722 (0.553, 0.79)        | 0.508 (0.342, 0.846)        | 0.5 (0.147, 0.867)         | 0.796 (0.458, 0.991)        |
|                                                | Gene-annotated | 0.455 (0.404, 0.513)        | 0.712 (0.676, 0.743)        | 0.489 (0.323, 0.549)        | 0.708 (0.57, 0.787)        | 0.471 (0.35, 0.739)         | 0.577 (0.213, 0.853)       | 0.751 (0.48, 0.973)         |
| <b>Elastic Net SNPs models</b>                 |                |                             |                             |                             |                            |                             |                            |                             |
| <b>SNPs from AD GWASs only</b>                 | P-significant  | 0.474 (0.403, 0.542)        | 0.721 (0.674, 0.764)        | 0.489 (0.308, 0.562)        | 0.712 (0.553, 0.793)       | 0.491 (0.349, 0.8)          | 0.576 (0.187, 0.92)        | 0.758 (0.435, 0.982)        |
|                                                | Gene-annotated | 0.481 (0.406, 0.553)        | 0.73 (0.674, 0.776)         | 0.505 (0.312, 0.575)        | 0.711 (0.58, 0.79)         | 0.481 (0.358, 0.786)        | 0.615 (0.2, 0.88)          | 0.743 (0.476, 0.982)        |
| <b>SNPs from AD + Neuro GWASs</b>              | P-significant  | 0.499 (0.406, 0.582)        | 0.743 (0.674, 0.795)        | 0.521 (0.33, 0.599)         | 0.729 (0.603, 0.8)         | 0.503 (0.368, 0.734)        | 0.608 (0.213, 0.88)        | 0.77 (0.52, 0.973)          |
|                                                | Gene-annotated | <b>0.511 (0.405, 0.602)</b> | <b>0.754 (0.675, 0.808)</b> | <b>0.535 (0.343, 0.613)</b> | <b>0.734 (0.61, 0.803)</b> | 0.505 (0.373, 0.727)        | <b>0.627 (0.227, 0.88)</b> | 0.77 (0.533, 0.969)         |

Abbreviations: AD, Alzheimer's Disease; APOE, apolipoprotein E; AUROC, Area Under the ROC Curve; AUPRC, Area Under the Precision-Recall Curve; EUR, European; GWAS, Genome-Wide Association Study; PRS, Polygenic Risk Score; SNP, Single-Nucleotide Polymorphism.

**Notes:**

[a] All models (if not other specified) have regressed out age, sex, and ancestry-specific principal components. Thresholds were determined by maximizing absolute Matthews correlation coefficient.

[b] All AD PRSs built with EUR, AFR, and multi-ancestry GWASs using P-significant/gene-annotated SNPs were included in the model at the same time.

[c] All AD PRSs built with EUR, AFR, and multi-ancestry GWASs, and neurodegenerative disease PRS (Parkinson's disease, progressive supranuclear palsy, Lewy body dementia, and stroke) using P-significant/gene-annotated SNPs were included in the model at the same time.



**Supplementary Table 6C.** Selected risk SNPs from the best-performing Elastic Net SNP model, UCLA ATLAS sample (East Asian American ancestry group, N = 673)

| rsID             | CHR | POS       | Variable Importance<br>(percentage, 95% CI) | Nearest Gene         | AD<br>EUR | AD<br>AFR | AD<br>multi | LBD | PD | PSP | Stroke |
|------------------|-----|-----------|---------------------------------------------|----------------------|-----------|-----------|-------------|-----|----|-----|--------|
| rs429358         | 19  | 44908684  | 0.127 (0.036, 0.26)                         | <i>APOE</i>          |           | x         |             |     |    |     |        |
| rs35106910       | 19  | 44781009  | 0.114 (0.021, 0.298)                        | <i>CBLC</i>          | x         |           |             |     |    |     |        |
| rs66626994       | 19  | 44924977  | 0.076 (0.009, 0.176)                        | <i>APOC1P1</i>       |           |           | x           | x   |    |     |        |
| rs483082         | 19  | 44912921  | 0.067 (0.007, 0.154)                        | <i>APOC1</i>         |           | x         | x           |     |    |     |        |
| rs59193782       | 17  | 45357199  | 0.053 (0.003, 0.136)                        | <i>CTB-39G8.2</i>    |           |           |             |     |    |     | x      |
| chr1:207368589:D | 1   | 207195244 | 0.053 (0.003, 0.138)                        | <i>RP11-164O23.7</i> | x         |           |             |     |    |     |        |
| rs34096562       | 8   | 16843772  | 0.053 (0.003, 0.137)                        | <i>RP11-13N12.1</i>  |           |           |             |     |    | x   |        |
| rs11724804       | 4   | 971991    | 0.051 (0.003, 0.14)                         | <i>DGKQ</i>          |           |           |             | x   | x  |     |        |
| rs6857           | 19  | 44888997  | 0.05 (0.004, 0.126)                         | <i>PVRL2</i>         |           | x         |             |     |    |     |        |
| rs7613           | 17  | 45394115  | 0.047 (0.003, 0.122)                        | <i>ARHGAP27</i>      |           |           |             |     |    |     | x      |
| rs2075650        | 19  | 44892362  | 0.045 (0.003, 0.111)                        | <i>TOMM40</i>        |           | x         | x           | x   |    |     |        |
| rs10769263       | 11  | 47395632  | 0.042 (0.003, 0.108)                        | <i>RP11-750H9.5</i>  | x         |           |             |     |    |     |        |
| rs117421612      | 17  | 45345796  | 0.029 (0.003, 0.056)                        | <i>RNA5SP443</i>     |           |           |             |     |    |     | x      |

Abbreviations: AD, Alzheimer's Disease; AFR, African American; CI, confidence interval; EUR, European; LBD, Lewy body dementia; PD, Parkinson's disease; PRS, Polygenic Risk Score; PSP, progressive supranuclear palsy; SNP, Single-Nucleotide Polymorphism.

**Supplementary Table 6D.** Mapped genes of selected risk SNPs from the best-performing Elastic Net SNP model, UCLA ATLAS sample (East Asian American ancestry group, N = 673)

| No | Gene            | Symbol        | CHR | Start     | End       | Type                 | posMap | eqtlMap (Direction) | ciMap |
|----|-----------------|---------------|-----|-----------|-----------|----------------------|--------|---------------------|-------|
| 1  | ENSG00000203710 | CR1           | 1   | 207669492 | 207813992 | protein_coding       | No     | Yes (+)             | No    |
| 2  | ENSG00000127419 | TMEM175       | 4   | 926175    | 952444    | protein_coding       | No     | Yes (-)             | No    |
| 3  | ENSG00000145214 | DGKQ          | 4   | 952675    | 980683    | protein_coding       | Yes    | Yes (-)             | No    |
| 4  | ENSG00000145217 | SLC26A1       | 4   | 972861    | 987228    | protein_coding       | No     | Yes (+)             | No    |
| 5  | ENSG00000253496 | RP11-13N12.1  | 8   | 16534414  | 16772553  | lincRNA              | Yes    | No                  | No    |
| 6  | ENSG00000175220 | ARHGAP1       | 11  | 46698630  | 46722165  | protein_coding       | No     | Yes (+)             | No    |
| 7  | ENSG00000255197 | RP11-750H9.5  | 11  | 47404699  | 47430741  | antisense            | Yes    | Yes (-)             | No    |
| 8  | ENSG00000165915 | SLC39A13      | 11  | 47428683  | 47438047  | protein_coding       | No     | Yes (-)             | No    |
| 9  | ENSG00000213619 | NDUFS3        | 11  | 47586888  | 47606114  | protein_coding       | No     | Yes (-)             | No    |
| 10 | ENSG00000196666 | FAM180B       | 11  | 47608198  | 47610746  | protein_coding       | No     | Yes (-)             | No    |
| 11 | ENSG00000184922 | FMNL1         | 17  | 43298811  | 43324687  | protein_coding       | No     | Yes (+)             | No    |
| 12 | ENSG00000233175 | CTD-2020K17.3 | 17  | 43315395  | 43319101  | antisense            | No     | Yes (+)             | No    |
| 13 | ENSG00000006062 | MAP3K14       | 17  | 43340488  | 43394414  | processed_transcript | No     | No                  | Yes   |
| 14 | ENSG00000199953 | RNA5SP443     | 17  | 43404732  | 43404863  | rRNA                 | Yes    | No                  | No    |
| 15 | ENSG00000267446 | CTB-39G8.2    | 17  | 43448768  | 43449423  | lincRNA              | Yes    | No                  | No    |
| 16 | ENSG00000159314 | ARHGAP27      | 17  | 43471275  | 43511787  | protein_coding       | Yes    | Yes (-)             | No    |
| 17 | ENSG00000214425 | LRR37A4P      | 17  | 43578685  | 43627701  | pseudogene           | No     | Yes (+)             | No    |
| 18 | ENSG00000263503 | RP11-707O23.5 | 17  | 43678235  | 43679706  | pseudogene           | No     | Yes (-)             | No    |
| 19 | ENSG00000204650 | CRHR1-IT1     | 17  | 43697694  | 43725582  | pseudogene           | No     | Yes (-)             | No    |
| 20 | ENSG00000185294 | SPPL2C        | 17  | 43922256  | 43924438  | protein_coding       | No     | Yes (-)             | No    |
| 21 | ENSG00000262500 | RP11-259G18.2 | 17  | 44320972  | 44322410  | pseudogene           | No     | Yes (-)             | No    |
| 22 | ENSG00000261575 | RP11-259G18.1 | 17  | 44344403  | 44346060  | pseudogene           | No     | Yes (-)             | No    |
| 23 | ENSG00000142273 | CBLC          | 19  | 45281126  | 45303891  | protein_coding       | Yes    | No                  | No    |
| 24 | ENSG00000130204 | TOMM40        | 19  | 45393826  | 45406946  | protein_coding       | Yes    | No                  | No    |
| 25 | ENSG00000130203 | APOE          | 19  | 45409011  | 45412650  | protein_coding       | Yes    | No                  | No    |
| 26 | ENSG00000130208 | APOC1         | 19  | 45417504  | 45422606  | protein_coding       | Yes    | No                  | No    |
| 27 | ENSG00000214855 | APOC1P1       | 19  | 45430061  | 45434643  | pseudogene           | Yes    | No                  | Yes   |
| 28 | ENSG00000104859 | CLASRP        | 19  | 45542298  | 45574214  | protein_coding       | No     | No                  | Yes   |

**Supplementary Table 7.** Descriptive statistics of demographic and electronic health record features, by data sources (All of Us vs. UCLA ATLAS, stratified by the genetic inferred group)

| Characteristic             | Hispanic Latino Americans |                   |         | African Americans |                    |         |
|----------------------------|---------------------------|-------------------|---------|-------------------|--------------------|---------|
|                            | All of Us                 | UCLA ATLAS        | p-value | All of Us         | UCLA ATLAS         | p-value |
| N                          | 526                       | 610               | -       | 2,644             | 440                | -       |
| Age                        | 74.0 (71.9, 78.2)         | 75.8 (72.5, 80.5) | <0.001* | 70.6 (67.6, 74.9) | 75.8 (72.5, 80.5)  | <0.001* |
| Sex (Female)               | 331 (63%)                 | 372 (61%)         | 0.5     | 1,735 (66%)       | 264 (60%)          | 0.02*   |
| Span of records (in yrs)   | 6.5 (5.7, 7.6)            | 9.1 (6.8, 10.2)   | <0.001* | 6.56 (6.08, 7.13) | 9.77 (7.27, 11.02) | <0.001* |
| Encounters per year        | 9 (5, 14)                 | 14 (8, 22)        | <0.001* | 9 (5, 15)         | 13 (8, 22)         | <0.001* |
| Number of encounters       | 59 (32, 104)              | 117 (64, 198)     | <0.001* | 62 (34, 107)      | 129 (71, 209)      | <0.001* |
| Number of unique diagnosis | 46 (28, 69)               | 71 (45, 109)      | <0.001* | 44 (27, 66)       | 71 (45, 103)       | <0.001* |
| Dementia (Yes)             | 81 (15%)                  | 126 (21%)         | 0.02*   | 181 (6.8%)        | 84 (19%)           | <0.001* |
| <i>APOE-e4</i> count       |                           |                   | <0.001* |                   |                    | <0.001* |
| 0                          | 486 (92%)                 | 491 (80%)         |         | 2,127 (80%)       | 284 (65%)          |         |
| 1                          | 38 (7.2%)                 | 117 (19%)         |         | 482 (18%)         | 137 (31%)          |         |
| 2                          | 2 (0.4%)                  | 2 (0.3%)          |         | 35 (1.3%)         | 19 (4.3%)          |         |

**Notes:** Continuous variables were reported as median (IQR), and categorical variables were reported as n (%). P-values were calculated based on Wilcoxon rank sum test or Pearson's Chi-squared test as appropriate. \* Statistical significant at level 0.05.

**Supplementary Table 8.** Descriptive statistics of demographic and electronic health record features by case/control groups, All of Us sample, stratified by genetic ancestry

|                            | Hispanic Latino Americans (N = 610) |                   |         | African Americans (N = 2,644) |                   |         |
|----------------------------|-------------------------------------|-------------------|---------|-------------------------------|-------------------|---------|
|                            | Cases                               | Controls          | P value | Cases                         | Controls          | P value |
| N                          | 81                                  | 445               | -       | 181                           | 2,463             | -       |
| Age                        | 73.1 (68.4, 80.1)                   | 74.0 (72.0, 78.0) | 0.03*   | 70.7 (65.7, 77.8)             | 70.5 (67.7, 74.8) | 0.4     |
| Sex (Female)               | 50 (62%)                            | 281 (63%)         | 0.80    | 113 (62%)                     | 1,622 (66%)       | 0.30    |
| Span of records (in yrs)   | 4.4 (2.6, 6.1)                      | 6.6 (6.0, 7.9)    | <0.001* | 4.25 (2.12, 6.14)             | 6.58 (6.18, 7.25) | <0.001* |
| Encounters per year        | 10 (5, 18)                          | 8 (5, 14)         | 0.14    | 14 (7, 23)                    | 9 (5, 15)         | <0.001* |
| Number of encounters       | 36 (15, 76)                         | 62 (35, 107)      | <0.001* | 52 (20, 96)                   | 63 (34, 108)      | <0.001* |
| Number of unique diagnosis | 47 (25, 68)                         | 45 (28, 69)       | 0.80    | 51 (31, 76)                   | 43 (27, 66)       | 0.01*   |

**Notes:** Continuous variables were reported as median (IQR), and categorical variables were reported as n (%). P-values were calculated based on Wilcoxon rank sum test or Pearson's Chi-squared test as appropriate. \* Statistical significant at level 0.05.

**Supplementary Table 9.** Pearson's correlation of polygenic risk scores that built with genome-wide-significant or gene-annotated SNPs, UCLA ATLAS sample, stratified by genetic inferred ancestry

| <b>Polygenic risk score GWAS</b>        | <b>Pearson's Correlation</b>    |                         |
|-----------------------------------------|---------------------------------|-------------------------|
|                                         | <b>Hispanic Latino American</b> | <b>African American</b> |
| Alzheimer's Disease (European ancestry) | 0.885                           | 0.837                   |
| Alzheimer's Disease (African ancestry)  | 0.953                           | 0.963                   |
| Alzheimer's Disease (multi-ancestry)    | 0.953                           | 0.919                   |
| Lewy Body Dementia                      | 0.714                           | 0.698                   |
| Parkinson's Disease                     | 0.561                           | 0.29                    |
| Progressive Supranuclear Palsy          | 0.813                           | 0.657                   |
| Stroke                                  | 0.737                           | 0.669                   |

*Abbreviations: GWAS, genome-wide association study, SNP, Single-Nucleotide Polymorphism.*

---

|       |                                                                      |
|-------|----------------------------------------------------------------------|
| AA    | African American                                                     |
| AD    | Alzheimer's disease                                                  |
| APOE  | Apolipoprotein E                                                     |
| AUPRC | Area Under the Precision-Recall Curve                                |
| AUROC | area under the receiver operating characteristic                     |
| CADD  | Combined Annotation-Dependent Depletion                              |
| CI    | confidence intervals                                                 |
| EA    | European American                                                    |
| EAA   | East Asian American                                                  |
| EHR   | Electronic Health Records                                            |
| FTD   | Frontotemporal dementia                                              |
| FUMA  | Functional Mapping and Annotation of Genome-Wide Association Studies |
| GIA   | Genetic Inferred Ancestry                                            |
| GO    | Gene Ontology                                                        |
| GWAS  | Genome-Wide Association Studies                                      |
| HLA   | Hispanic Latino American                                             |
| LBD   | Lewy body dementia                                                   |
| LD    | Linkage disequilibrium                                               |
| MCC   | Matthews Correlation Coefficient                                     |
| PC    | principal components                                                 |
| PDD   | Parkinson's disease dementia                                         |
| PRS   | Polygenic risk scores                                                |
| SAA   | South Asian American                                                 |
| SNP   | Single-Nucleotide Polymorphisms                                      |

---
